# Supplementary material for: Molecular characterization of the missing electron pathways for butanol synthesis in Clostridium acetobutylicum
Source: PubMed Central journal article supplement (PMC9365771; doi:10.1038/s41467-022-32269-1), 2022-08-10
Supplement: 41467_2022_32269_MOESM1_ESM.pdf [file 41467_2022_32269_MOESM1_ESM.pdf]

**Molecular characterization of the missing electron pathways for butanol  
synthesis in *Clostridium acetobutylicum***

Foulquier *et al.*

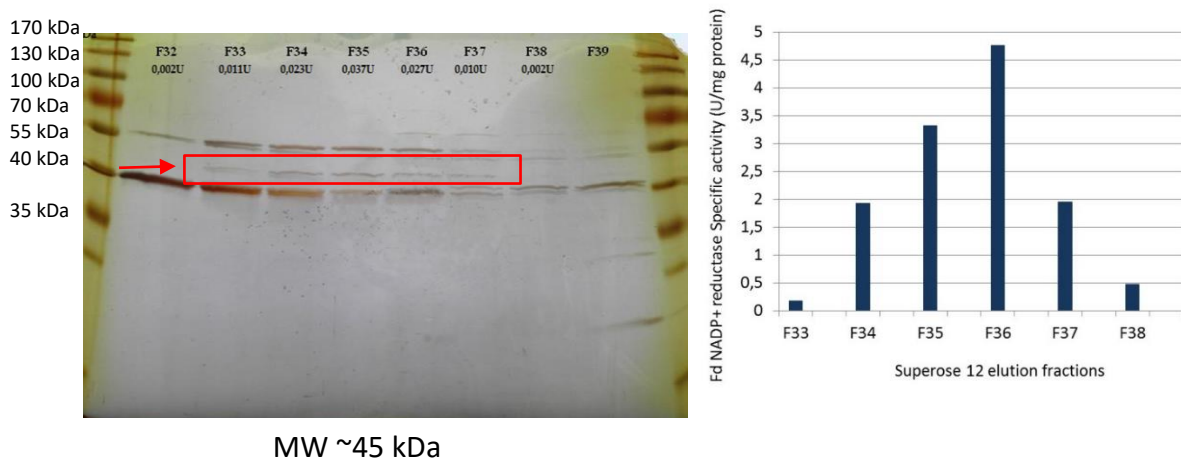

**a**

**b**

**Supplementary Fig. 1. Purification of the ferredoxin-NADP<sup>+</sup> reductase.** This experiment was performed twice with similar results. a) SDS-PAGE analysis of active eluted fractions collected after Superose 12 chromatographic separation (proteins were silver stained). b) Ferredoxin-NADP<sup>+</sup> reductase activity of the corresponding fractions.

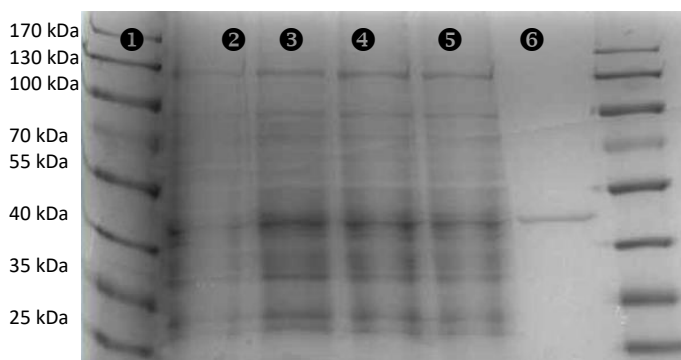

**Supplementary Fig. 2. Purification of CAC0764-Strep-tag.** This experiment was performed twice with similar results. SDS-PAGE of purified CAC0764-Strep-tag 1) protein ladder 2) cell-free extract 3) streptomycin sulfate treatment 4) avidin treatment 5) loaded sample 6) active eluted fraction. B) Enzymatic activities of the CAC0764-Strep-tag protein determined using methyl viologen (blue) or reduced ferredoxin (red).

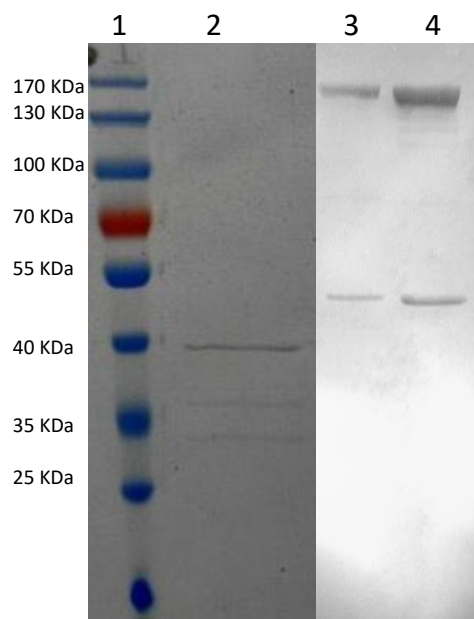

**Supplementary Fig. 3. Purification of the ferredoxin-NAD<sup>+</sup> reductases.** This experiment was only performed once. Silver-stained SDS-PAGE of the 1) protein ladder, 2) active eluted fractions from Resource Q, and 3-4) active eluted fraction from gel filtration.

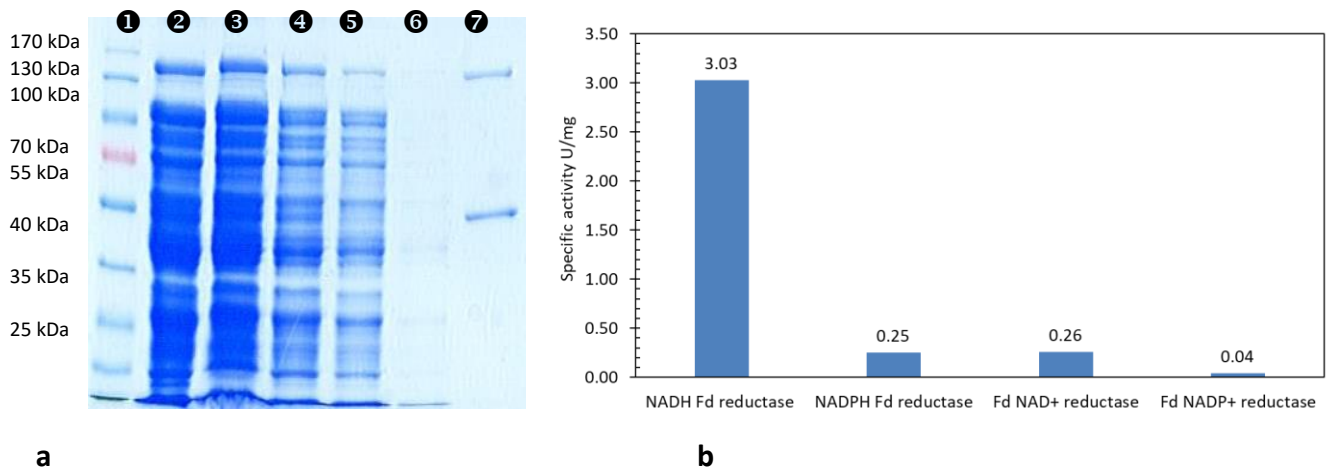

**Supplementary Fig. 4. Purification of the GltA-GltB-Strep-tag complex.** This experiment was only performed once. **a)** Coomassie blue SDS-PAGE. 1) protein ladder 2) cell-free extract 3) streptomycin sulfate treatment 4) avidin treatment 5) loaded sample 6) washed fraction 7) active eluted fraction. **b)** Enzymatic activities of the purified GltA-GltB-Strep-tag complex determined using methyl viologen in all enzyme assays.

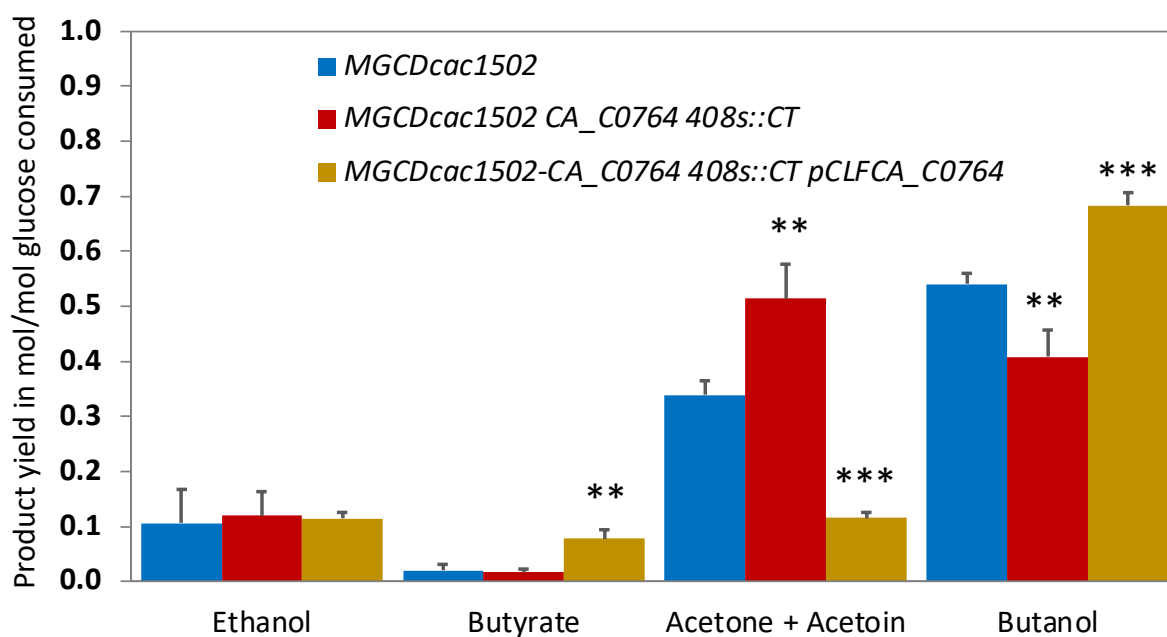

**Supplementary Fig. 5. Comparative final product yields in mol/mol of glucose consumed for the three *C. acetobutylicum* strains: *MGCΔcac1502* (blue), *MGCΔcac1502-CA\_C0764-408s::CT* (red), *MGCΔcac1502-CA\_C0764-408s::CT (pCLFCA\_C0764)* (brown).** Each error bar indicates the standard deviation around the mean of three independent cultures in serum bottles at 37°C in SM medium<sup>8</sup>. Asterisk indicates that the results were significantly different from the control according to the one-sided Student's *t*-test, with \* for *P*-value ≤ 0.05, \*\*for *P*-value ≤ 0.01, and \*\*\*for *P*-value ≤ 0.001. Source data are provided as a Source Data file.

|         |       | Section 1                                                                |     |     |     |     |     |     |     |  |  |
|---------|-------|--------------------------------------------------------------------------|-----|-----|-----|-----|-----|-----|-----|--|--|
|         |       | 1                                                                        | 10  | 20  | 30  | 40  | 50  | 60  | 70  |  |  |
| CAC0764 | (1)   | -----MDNPNLLSEEANRCLLCKNPRKANKCPINTPIPEIISL                              |     |     |     |     |     |     |     |  |  |
| GltB    | (1)   | MGKVTGFKKEYDREESPSRPIDERIKDYKDVHMGDLKELKIQGARCMCEGTPFCSWGCPDGNLMPDFNDM   |     |     |     |     |     |     |     |  |  |
|         |       | Section 2                                                                |     |     |     |     |     |     |     |  |  |
|         |       | 71                                                                       | 80  | 90  | 100 | 110 | 120 | 130 | 140 |  |  |
| CAC0764 | (71)  | YKEGKIMEAGEILFNNNPLSVICSLVCIHEDQCKGNCVRGIKSEPIKPFHEIEEETISEKYLKEAKLKN--- |     |     |     |     |     |     |     |  |  |
| GltB    | (71)  | VYKGEWKKAYERISLTSFCPEFTGRIKCP--ALCEGSCTLSYNSDAVSIKIEILGIIIEEAFKNGWVKPKIP |     |     |     |     |     |     |     |  |  |
|         |       | Section 3                                                                |     |     |     |     |     |     |     |  |  |
|         |       | 141                                                                      | 150 | 160 | 170 | 180 | 190 | 200 | 210 |  |  |
| CAC0764 | (141) | VQKDKDRIAVGGGPAGITVAFVLANKGYNVTIFEAHKIIGVLRYPPEYRLTKKLVDKLEERLIEVGV      |     |     |     |     |     |     |     |  |  |
| GltB    | (139) | KVRITGKRIAVLGGPAGLSAAEELNSVGHSVVVFERRADKVGGLLRYPDFKLEKHHVIDRRIDVMEKSGI   |     |     |     |     |     |     |     |  |  |
|         |       | Section 4                                                                |     |     |     |     |     |     |     |  |  |
|         |       | 211                                                                      | 220 | 230 | 240 | 250 | 260 | 270 | 280 |  |  |
| CAC0764 | (211) | KIRPNTVTIGPVTSLDRILLEDSYKAVFTGTGVWNPKTLDVKG-ETLGNVHFALDYLKSP-----        |     |     |     |     |     |     |     |  |  |
| GltB    | (209) | EFKTSNVTGFDVSAEELLND-EDVVLITGGSTIPRDLKVEGRENTKGVHFAVDYLKQQNMRNAGMEIKEE   |     |     |     |     |     |     |     |  |  |
|         |       | Section 5                                                                |     |     |     |     |     |     |     |  |  |
|         |       | 281                                                                      | 290 | 300 | 310 | 320 | 330 | 340 | 350 |  |  |
| CAC0764 | (281) | ESYRLGKKVAVIGAGNVAMDAAARTAKRNGAEVTILYRKSFNEMPAKQKQ-----IR-----ET-KEDGV   |     |     |     |     |     |     |     |  |  |
| GltB    | (278) | EITAKDKVVVIGGGDTGSDCIGTAIRQGAKKVYQY-EIMDKPPAQRDETMPWPLFPRVFKTTTSHEEGC    |     |     |     |     |     |     |     |  |  |
|         |       | Section 6                                                                |     |     |     |     |     |     |     |  |  |
|         |       | 351                                                                      | 360 | 370 | 380 | 390 | 400 | 410 | 420 |  |  |
| CAC0764 | (351) | EFKLFRAPIETTEEG----IKVAFTEENVTD AEGKIRTKIIEGK--EEFFECDSVVVAVSQAPKDNIVSN  |     |     |     |     |     |     |     |  |  |
| GltB    | (347) | ERLFGVSTKKEGKDGKLELLKGVQVKWEKDENGKMSMKIEGSEFEKKVDLILLAMGFVHPQHKGIVED     |     |     |     |     |     |     |     |  |  |
|         |       | Section 7                                                                |     |     |     |     |     |     |     |  |  |
|         |       | 421                                                                      | 430 | 440 | 450 | 460 | 470 | 483 |     |  |  |
| CAC0764 | (421) | TTGLDTKWGLIVTDEKGNTRKKGTFACGDVVTGAKTVVEAAAQAKVV AETID EYCKNN-----        |     |     |     |     |     |     |     |  |  |
| GltB    | (417) | LQLKLDSTRGNVFTDENFMTSRENVFAAGDMRRGQSLVWVAMHEGRQSAKEIDKYL MGETSLRG        |     |     |     |     |     |     |     |  |  |

**Supplementary Fig. 6. Alignment of the protein sequences of CAC0764 and GltB (CAC1674).** Protein sequences of CAC0760 and GltB were aligned using AlignX from vector NTI (Invitrogen)

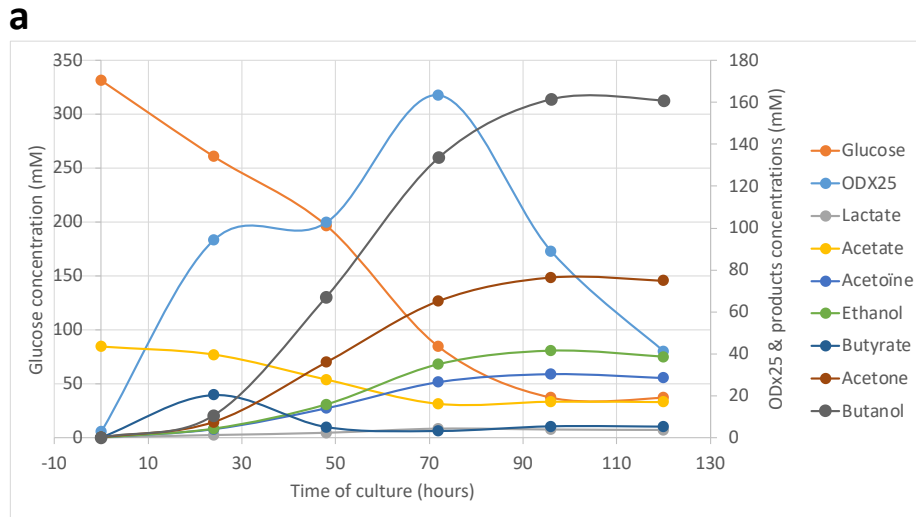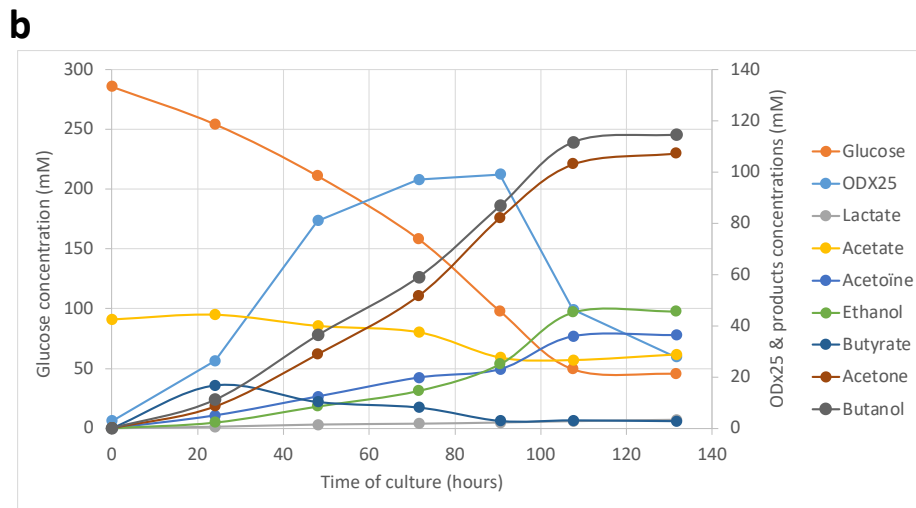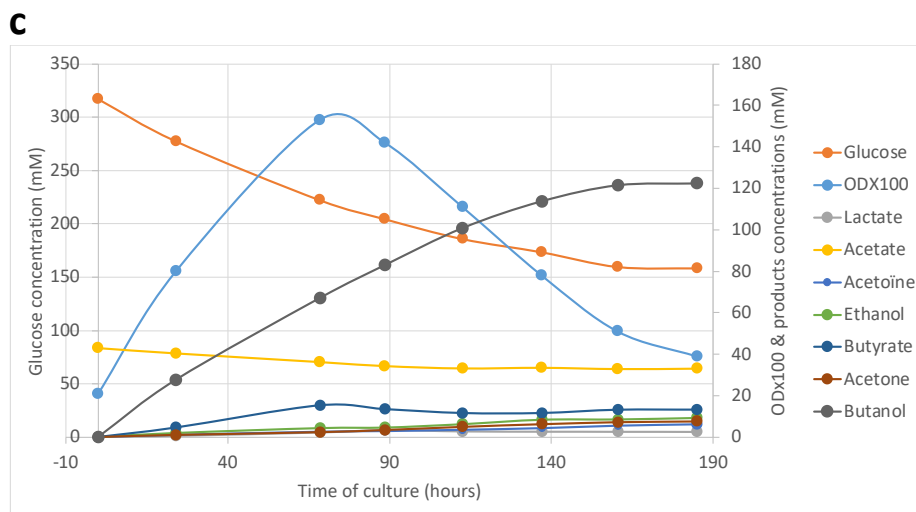

**Supplementary Fig. 7. Batch fermentation of *C. acetobutylicum* strains: a) *MGCΔcac1502*, b) *MGCΔcac1502-CA\_C0764-408s::CT* and c) *MGCΔcac1502 (pCLFCA\_C0764)*. Fermentations were performed in serum bottles at 37°C in SM medium<sup>8</sup>.**

**Supplementary Table 1. List of strains and plasmids used in this study.**

| Strains/Plasmids                           | Relevant characteristics*                                                                             | Source                 |
|--------------------------------------------|-------------------------------------------------------------------------------------------------------|------------------------|
| <b><i>C. acetobutylicum</i></b>            |                                                                                                       |                        |
| ATCC 824                                   | Wild type                                                                                             | ATCC                   |
| MGCΔ1502                                   | ΔCA_C1502                                                                                             | 1                      |
| MGCΔ1502 pCons2-1                          | ΔCA_C1502                                                                                             | 1                      |
| MGCΔ1502-CA_C0764-408s::CT                 | MGCΔ1502 CA_C0764 mutant                                                                              | This study             |
| MGCΔ1502-CA_C0764-408s::CT<br>pCLFCA_C0764 | complemented MGCΔ1502 CA_C0764 mutant<br>overexpression of CA_C0467 gene from the pCLF942<br>plasmid  | This study             |
| MGCΔ1502 pCLFCA_C0764                      |                                                                                                       | This study             |
| MGCΔ1502-gltB181s::CT                      | MGCΔ1502 gltB mutant                                                                                  | This study             |
| MGCΔ1502 pCLF bcd-etfB-etfA                | overexpression of bcd-etfB-etfA genes from the<br>pCLF942 plasmid                                     | This study             |
| <b><i>E. coli</i></b>                      |                                                                                                       |                        |
| TOP10                                      |                                                                                                       | Invitrogen             |
| <b>Plasmids</b>                            |                                                                                                       |                        |
| pThl_HydA-LL-Ctag                          | MLS <sup>r</sup> ; AP <sup>r</sup> ; repL; hydA<br>with hydA promoter and adc terminator              | 2                      |
| pCST-LL-CA_C0764                           | pPH_HydA-LL-Ctag derivative with CA-C0764<br>insertion and<br>pPH replacement with pthl               | This study             |
| pCST-LL-etfB-etfA                          | pPH_HydA-LL-Ctag derivative with etfB and etfA<br>insertion and<br>pPH replacement with pthl          | 3                      |
| pCST-LL-bcd-etfB-etfA                      | pCST-LL-etfBetfA derivative with bcd insertion                                                        | 3                      |
| pSOS94                                     | MLS <sup>r</sup> ; AP <sup>r</sup> ; repL ; ctfa ; ctfb ; adc<br>with ptb promoter and adc terminator | GenBank:<br>AY187685.1 |
| pCLF1                                      | Cm <sup>r</sup> ; repL ; flp1                                                                         | 1                      |
| pCLF CA_C0764                              | pCLF1 derivative with CA_C0764<br>with ptb promoter and adc terminator                                | This study             |
| pCLF bcd-etfB-etfA                         | pCLF1 derivative with bcd-etfB-etfA<br>with ptb promoter and adc terminator                           | This study             |
| pMTL007                                    |                                                                                                       | 4                      |
| pMTL007::cac-CA_C0764-408s                 | Clostron plasmid retargeted to <i>C. acetobutylicum</i><br>CA_C0764 gene                              | This study             |
| pMTL007::cac-gltB181s                      | Clostron plasmid retargeted to <i>C. acetobutylicum</i><br>gltB gene                                  | This study             |
| pMTL007::cac-CA-C2710-159s                 | Clostron plasmid retargeted to <i>C. acetobutylicum</i><br>CA_C2710 gene                              | This study             |
| pMTL007::cac-CA-C2710-101as                | Clostron plasmid retargeted to <i>C. acetobutylicum</i><br>CA_C2710 gene                              | This study             |

\*abbreviations: MLS<sup>r</sup>: macrolide, lincosamide, Streptogramin B resistance; Ap<sup>r</sup>: ampicillin resistance; catP: thiamphenicol resistance

**Supplementary Table 2. List of primers used in this study (provided by Eurogentec UK).**

| Name                | Oligonucleotide sequences (5'→3')                                                                                              |
|---------------------|--------------------------------------------------------------------------------------------------------------------------------|
| 408/409s-IBS        | AAAAAAGCTTATAATTATCCTTAGGCTACAATGTTGTGCGCCAGATAGGGTG                                                                           |
| 408/409s-EBS1d      | CAGATTGTACAAATGTGGTGATAACAGATAAGTCAATGTTACTAACTTACCTTTCTTTGT                                                                   |
| 408/409s-EBS2       | TGAACGCAAGTTTCTAATTTGATTTAGCCTCGATAGAGGAAAAGTGTCT                                                                              |
| cac0764del_for      | cgagccaataaaatttcacgagata                                                                                                      |
| cac0764del_rev      | ccaacctctataagtcttcttcaagctta                                                                                                  |
| Ocac0764f           | AGGATCCATCAAAATTTAGGAGGTTAGTTA                                                                                                 |
| Ocac0764r           | GGCGCCTTAATTATTCTTGCAATACTCATCAATAGTTTC                                                                                        |
| ESB universal       | gtttactgaacgcaagtttctaatttcg                                                                                                   |
| ErmB3'- R- F        | cgccaaagtaacaattaagtaccgttac                                                                                                   |
| fabZf               | TCCAAGTATAGGCTTCTTTCCC                                                                                                         |
| fabZr               | GGTCATTACCCAGGTAAACCA                                                                                                          |
| gapCf               | CACATTAGATGGTCCACACAGAA                                                                                                        |
| gapCr               | AGCTAAGTCAGGAATAAATTGGC                                                                                                        |
| gapNf               | GGTTCTTGAGCTTGGTGGTAAA                                                                                                         |
| gapNr               | TTACAGCAGTACACCTTTGGC                                                                                                          |
| ccac0764BAMf        | aattggatccatcaaaatttaggaggttagttagaatggataaccctaatttattgtcagaag                                                                |
| ccac0764SMAR        | aattcccgggattattcttgcaatactcatcaatagtttc                                                                                       |
| CAC2710-101asIBS    | aagcttataattatccttaccttcccttatagtgcgccagatagggtg                                                                               |
| CAC2710-159sIBS     | gcacttgaggaagtgcgccagatagggtg                                                                                                  |
| CAC2710-159sEBS1d   | acaaagaaagtaagttagcttctcgacttatctgttatcaccacattgtacaatctg<br>AAATGAGCACGTTAATCATTTAACATAGATAAATTGGATCCAGGAGGTAAGTTTATATGGATTTA |
| RBS nat bcd_rec for | ATTTAACAAG<br>AGAAACAATCTCTTTTACTGGCAAATCATTAAGTGGCGCCTTAATTATTAGCAGCTTTAACTTGA                                                |
| etfa_rec_rev        | GCTATTAA                                                                                                                       |
| pCLF prom seq_for   | AACACCACGTAGTTATTGGGAGG                                                                                                        |
| pCLF term_rev       | CTGCAAGAATGTGAGAGCTAG                                                                                                          |
| psos prom univ      | cttttgctctagagcacacgg                                                                                                          |
| pSOSterm            | ccgctcacaattccacacaacatag                                                                                                      |
| gltB_direct181S     | GCTGCAGTTAATATGTAAGGGGGCGG                                                                                                     |
| gltB_reverse181S    | CCTTTGGAATCTTAGGCTTTACCCATCC                                                                                                   |



**Supplementary Table 3. Comparative redox analysis of *MGCΔcac1502*, *MGCΔcac1502-CA\_C0764-408s::CT* and *MGCΔcac1502 pCLFCA-C0764* strains cultured under solventogenic conditions.**

|                                                  | Strains         |                                  |                             |
|--------------------------------------------------|-----------------|----------------------------------|-----------------------------|
|                                                  | <i>MGCΔ1502</i> | <i>MGCΔ1502CA-C0764-408s::CT</i> | <i>MGCΔ1502 pCLFcac0764</i> |
| mole of NADH produced in the glycolytic pathway  | 2               | 1.44                             | 2                           |
| mole of NADPH produced in the glycolytic pathway | 0               | 0.56                             | 0                           |
| mole of NADH produced from reduced ferredoxin    | 0.55            | 0.47                             | 1.6                         |
| mole of NADPH produced from reduced ferredoxin   | 0.74            | 0                                | 0.8                         |
| mole of Fdred reoxidized by hydrogenase          | 1.2             | 1.85                             | 0.33                        |

The distribution of the electrons was described for 1 mole of glucose consumed in the glycolytic pathway.

## Supplementary Method 1. plasmid construction

### Construction of *pMTL007::cac-CA\_C0764-408s*

The intron target site was identified at bp 408/409 (from the start of the ORF) on the sense strand, and the intron retargeting PCR primers 408/409-IBS, 408/409-IEBS1d, and 408/409-EBS2 (Supplementary Table 2) were designed using a computer algorithm<sup>5</sup>. The three primer sets 408/409-IBS, 408/409-IEBS1d, 408/409-EBS2 and the EBS universal primers were used in a single-tube reaction with the *pMTL007* plasmid<sup>4</sup> to mutate the intron at several positions spanning a 350 bp region. PCR designed to retarget the intron by primer-mediated mutation was performed according to the protocol of the Targetron Gene Knockout System Kit (<http://www.sigmaaldrich.com/life-science/functional-genomics-and-rnai/targetron.html>).

The 350 bp PCR fragment was purified and then cloned into the *pMTL007* plasmid at the HindIII and BsrGI sites to replace the original intron fragment using T4 DNA ligase (New England Biolabs, Evry, France). The ligation product was then introduced into Top10 chemically competent *E. coli* cells (Invitrogen™). Single colonies were then grown in LB liquid culture supplemented with ampicillin (100 µg/mL) overnight at 37°C to finally carry out DNA plasmid extraction (GenElute HP plasmid miniprep kit, Sigma) and check for the presence of the *pMTL007::cac-CA\_0764-408s* plasmid. The retargeted *pMTL007::cac-CA\_0764-408s* plasmid was finally controlled by restriction and by DNA sequencing using the 408/409-IBS and 408/409-IEBS1d primers (Supplementary Table 2).

### Construction of *pMTL007Ca::gltB-180s*

A similar method was applied to generate the intron-retargeted *pMTL007Ca::gltB-180s* plasmid. The intron target site was identified at 181/182 bp on the sense strand using the Perutka algorithm<sup>5</sup>.

### **Construction of *pMTL007Cs::2710-101as* and *pMTL007Cs::2710-159s***

The Perutka algorithm<sup>5</sup> was used to identify the intron target site. Two positions, 101/102 on the antisense strand and 159/160 on the sense strand, were selected.

### **Construction of *pCLF-CA\_C0764***

The *CA\_C0764* gene was amplified from the genomic DNA of *C. acetobutylicum* ATCC824 using the *Ocac0764f* and *Ocac0764r* primers (Supplementary Table 2). The primers were designed to introduce an RBS region along with the *CA\_C0764* gene, as well as placing *Bam*HI and *Sfo*I restriction sites upstream and downstream, respectively. The amplified PCR fragment using the proofreading Phusion DNA polymerase (New England Biolabs) was then subcloned into a Zero Blunt TOPO vector (Invitrogen, Saint Aubin, France) to yield the Zero Blunt TOPO-*CA\_C0764* plasmid, and the product was sequenced using universal primers T7P and T3P to assure that no mutations were introduced. The fragment containing the *CA\_C0764* gene was purified on an agarose gel after digestion of the Zero Blunt TOPO-*cac0764* vector with *Bam*HI and *Sfo*I. The 7 kb *pSOS94* vector<sup>6</sup> was also digested with *Bam*HI and *Sfo*I (New England Biolabs) and ligated to the *Bam*HI-*Sfo*I digested *sadh* gene, yielding the 6.25 kb *pSOS94-CA-C0764* vector. The *pSOS94-CA\_C0764* vector was digested with *Sal*I, and the operon-containing fragments from each vector were purified on an agarose gel. The 4.9 kb *pCLF1* vector<sup>1</sup> was digested with *Sal*I, treated with Antarctic phosphatase and ligated with the previously purified fragment to yield *pCLF-CA\_C0764*.

### **Construction of *pCLF-bcd-etfb-etfa***

The *bcd-etfb-etfa* operon was amplified from the genomic DNA of *C. acetobutylicum* MGC $\Delta$ *cac1502* using the RBS *nat bcd\_rec\_for* and *etfa\_rec\_rev* primers (Supplementary Table 2). The primers were designed to introduce the native *bcd* RBS along with the operon and *pCLF-CA\_C0764* homologous regions. The purified PCR product was directly ligated with *pCLF-CA\_C0764* previously digested with *ScaI* et *SfoI* and purified using the GeneArt<sup>®</sup> Seamless Cloning & Assembly Kit (Thermo Fisher Scientific, Saint Aubin, France). The *pCLF-bcd-etfb-etfa* plasmid was controlled by PCR using the primers *pCLF prom seq\_for* and *pCLF term\_rev* (Supplementary Table 2), by restriction profiling, and finally by promoter-*bcd-etfb-etfa*-terminator region resequencing.

#### **Construction of the *pCST-LL-CA\_C0764***

The *CA\_C0764* gene was amplified from the genomic DNA of *C. acetobutylicum* ATCC824 using *ccac0764BAMf* and *ccac0764SMAr* primers (Supplementary Table 2). The primers were designed to introduce an RBS region along with the *CA\_C0764* gene, as well as placing *BamHI* and *SmaI* restriction sites upstream and downstream, respectively. The purified PCR product was further ligated with the product digested with *BamHI* and *SmaI* and purified *pthIA-CaHydA-LL-C-Tag* plasmid<sup>2</sup>, yielding the *pCST-LL-CAC0764* vector. The *pCST-LL-CAC0764* vector was checked by PCR using *pSOSprom\_univ* and *pSOSterm* primers (Supplementary Table 2) with the One taq DNA polymerase (New England Biolabs), by restriction profiling, and finally by promoter-*CAC\_O764-CST*-terminator region resequencing.

## Supplementary Method 2. Transformation procedures

*E. coli* Top10 (Invitrogen) was transformed using heat shock (30 s at 42°C) following the manufacturer's instructions. *MGCΔcac1502* was electroporated<sup>7</sup>, except that unmethylated DNA was used because the *cac1502* gene encoding the type II restriction endonuclease Cac824I was deleted<sup>1</sup>. For transformation with the retargeted *pMTL007::cac-CA\_C0764-408s*, after 5 hours of recovery, cells were plated on RCA (Clostridium Nutrient Medium with 15 g/L agar and Fluka (Saint-Quentin Fallavier, France, n°27546) medium supplemented with thiamphenicol (10 µg/mL)). Single colonies were chosen from the plate and streaked separately on an RCA plate with erythromycin (40 µg/mL) to select integrants. The insertion mutants were screened via colony PCR using the *One taq* DNA polymerase (New England Biolabs) and the primers *cac0764del\_for* and *cac0764del\_rv* (Supplementary Table 2) flanking the target site. The PCR products were purified and confirmed by DNA sequencing. One of the colonies was selected to cure the *pMTL007::cac-CA\_C0764-408s* plasmid and generate *MGCΔcac1502CA\_C0764-408s::CT*. This clone was inoculated into Clostridium Growth Medium (CGM) supplemented with erythromycin (40 µg/mL) for successive subcultures<sup>6</sup>. One hundred microliters of fully grown culture was inoculated into 1 mL of fresh CGM supplemented with erythromycin (40 µg/mL) and grown anaerobically at 37°C for at least 12 hours until full growth was achieved. This transfer process was repeated at least 3 times. The last culture was then plated onto a solid RCA plate supplemented with erythromycin (40 µg/mL). Colonies were restreaked successively onto RCA plates supplemented with thiamphenicol (10 µg/mL) and then onto RCA plates supplemented with erythromycin (40 µg/mL). One erythromycin-resistant and thiamphenicol-sensitive clone was selected and inoculated into 3 mL of SM<sup>8</sup> supplemented with erythromycin (40 µg/mL), grown anaerobically at 37°C for at least 24 hours and transferred to 30 mL of SM supplemented with erythromycin (40 µg/mL). The culture was grown anaerobically at 37°C for

7 days until sporulation, and then the spore suspension was stored at  $-20^{\circ}\text{C}$ . Southern hybridization was finally used to validate the presence of a single-intron insertion into the genome of *MGC $\Delta$ cac1502CA\_C0764-408s::CT*.

A similar approach was applied to yield the *MGC $\Delta$ cac1502-gltB181s::CT* strain. The insertion mutants were screened using the *One taq* DNA polymerase (New England Biolabs) and the primers *gltB181s* direct and *gltB181s* reverse (Supplementary Table 2) flanking the target site. The PCR products were purified and confirmed by DNA sequencing.

For transformation with *pCLFCA\_C0764* and *pCLF-bcd-etfb-etfa*, after 5 hours of recovery, cells were plated on RCA medium supplemented with thiamphenicol (10  $\mu\text{g}/\text{mL}$ ). Single colonies were chosen from the plate and streaked separately on an SM plate with thiamphenicol (10  $\mu\text{g}/\text{mL}$ ).

For transformation with *pCST-LL-CA\_C0764* and *pCST-LLbcd-etfb-etfa*, after 5 hours of recovery, cells were plated on RCA medium supplemented with erythromycin (40  $\mu\text{g}/\text{mL}$ ). Single colonies were chosen from the plate and streaked separately on an SM plate with erythromycin (40  $\mu\text{g}/\text{mL}$ ).

### **Supplementary Method 3. Southern blot analysis**

Chromosomal DNA (3–6 µg) of both the *MGCΔ1502* and *MGCΔ1502-CA\_C0764-408s::CT* strains was digested with the HindIII-HF restriction enzyme and loaded on a 0.8% agarose gel. The transfer was performed in 20xSSC on a nylon membrane. The probe used for hybridization was generated by PCR using ESB universal and ErmB3'- R- F primers (Supplementary Table 2) and then labeled using a DIG High Prime DNA Labeling and Detection Starter Kit II (Roche, Mannheim Germany). The protocols for hybridization and detection were performed according to the Roche instructions.

#### **Supplementary Method 4. RNA isolation, cDNA synthesis and RT-qPCR analysis**

After the activation of spores by heat treatment at 80°C for 15 min, both *MGCΔcac1502* and *MGCΔcac1502 cac0764-408s::CT* strains were cultivated in duplicate in 60-mL glass vials under strict anaerobic conditions at 37°C in SM<sup>8</sup>.

When the OD<sub>620</sub> of *MGCΔcac1502* and *MGCΔcac1502CA\_C0764-408s::CT* cultures reached 2.9 and 1.5, respectively, cultures were sampled, immediately frozen in liquid nitrogen and stored at -80°C until use.

Total RNA isolation was performed as previously described<sup>3</sup>. Briefly, the frozen sampled cultures were ground promptly in a liquid nitrogen-cooled mortar. RNA was extracted using a RNeasy Midi Kit (Qiagen). Contaminant genomic DNA was then removed using the RNase-Free DNase Set (Qiagen) following the manufacturer's instructions, and the total DNase-treated RNA was then purified and concentrated using an RNA Cleanup Kit (Qiagen). RNA quantification was performed using a NanoDrop ND-1000 spectrophotometer (Labtech France) at 260 nm, and purity was analyzed by determining the 260 nm/280 nm ratio (purity > 2.1). RNA integrity was also verified on RNA 6000 Nano Chips using an Agilent 2100 Bioanalyzer (Agilent Technologies). For cDNA synthesis, 1 µg of total RNA was used in a 20 µL reverse transcription (RT) reaction mixture containing iScript Reverse-transcriptase and a blend of oligo(dT) and random hexamer primers using the iScript™ cDNA Synthesis Kit (Bio-Rad) according to the manufacturer's instructions.

Quantitative real-time PCR (qPCR) was conducted with a MyiQ™ Real Time PCR Detection System (Bio-Rad). Each sample was tested in triplicate in a 96-well plate (Bio-Rad). The reaction



mix (25  $\mu$ L final volume) consisted of 12.5  $\mu$ L of SsoAdvanced Universal SYBR Green Supermix (Bio-Rad), 2.5  $\mu$ L of the primer pair (200 nM final concentration), 2.5  $\mu$ L of HO and 5  $\mu$ L of a 1/10 dilution of the cDNA preparation. The absence of possible genomic DNA contamination was checked in each DNase-treated RNA sample. A blank (no template control) was also incorporated in each assay. The thermocycling program consisted of one hold at 95°C for 30 s, followed by 40 cycles of 10 s at 95°C and 30 s at 57°C. After completion of these cycles, melting-curve data were then collected to verify PCR specificity, contamination and the absence of primer dimers.

The *fabZ* gene (*CA\_C3571*) was chosen as an internal control<sup>9</sup>. The primer pairs *fabZf/fabZr*, *gapCf/gapCr* and *gapNf/gapNr* (Supplementary Table 2) were used to amplify the *fabZ*, *gapC* (*CA\_C0709*) and *gapN* genes (*CA\_C3657*), respectively.

Expression data and associated technical errors were calculated on triplicate experiments using the gene expression module of iQ5 software (Bio-Rad), which uses the model outline on the geNorm website.

## Supplementary references

1. Croux, C., Nguyen, N. P. T., Lee, J., Raynaud, C., Saint Prix, F., Gonzales Pajuelo, M., Meynial-Salles, I. & Soucaille, P. Construction of a restriction-less, marker-less mutant useful for functional genomic and metabolic engineering of the biofuel producer *Clostridium acetobutylicum*. *Biotechnol. Biofuels* **9**, 23 (2016).
2. Caserta, G., Papini, C., Adamska-Venkatesh, A., Pecqueur, L., Sommer, C., Reijerse, E., Lubitz, W., Gauquelin, C., Meynial Salles, I., Pramanik, D., Artero, V., Atta, M., del Barrio, M., Faivre, B., Fourmond, V., Léger, C. & Fontecave, M. Engineering an [FeFe]-Hydrogenase: Do accessory clusters influence O<sub>2</sub> resistance and catalytic bias ? *J. Am. Chem. Soc.*, **140**, 5516-5526 (2018).
3. Yoo, M., Bestel-Corre, G., Croux, C., Riviere, A., Meynial-Salles, I. & Soucaille, P. A quantitative system-scale characterization of the metabolism of *Clostridium acetobutylicum*. *mBio* **6**, e01808–15 (2015).
4. Heap, J. T., Pennington, O. J., Cartman, S. T., Carter, G. P. & Minton, N. P. The CloStron: a universal gene knock-out system for the genus *Clostridium*. *J. Microbiol. Methods*. **70**, 452-64 (2007).
5. Perutka, J., Wang, W., Goerlitz, D. & Lambowitz, A. M. Use of computer-designed group II introns to disrupt *Escherichia coli* DExH/D-box protein and DNA helicase genes. *J. Mol. Biol.* **336**, 421-39 (2004).
6. Dusséaux, S., Croux, C., Soucaille, P. & Meynial-Salles, I. Metabolic engineering of *Clostridium acetobutylicum* ATCC 824 for the high-yield production of a biofuel composed of an isopropanol/butanol/ethanol mixture. *Metab. Eng.*, **18**,1-8 (2013).
7. Mermelstein, L. D., Welker, N. E., Bennett, G. G. & Papoutsakis, E.,T. Expression of cloned homologous fermentative genes in *Clostridium acetobutylicum* ATCC 824. *Biotechnology* **10**, 190-195 (1992).
8. Girbal, L. & Soucaille, P. Regulation of *Clostridium acetobutylicum* metabolism as revealed by mixed-substrate steady-state continuous cultures: Role of NADH/NAD ratio and ATP pool. *J. Bacteriol.* **176**, 6433–6438 (1994).
9. Jones, S. W., Paredes, C. J., Tracy, B., Cheng, N., Sillers, R., Senger, R. S. & Papoutsakis, E. T. The transcriptional program underlying the physiology of clostridial sporulation. *Genome Biol.* **9**, R114 (2008).
